# Supplementary material for: A modified live bat influenza A virus-based vaccine prototype provides full protection against HPAIV H5N1
Source: PubMed Central journal article supplement (PMC7229168; doi:10.1038/s41541-020-0185-6), 2020-05-15
Supplement: 41541_2020_185_MOESM1_ESM.pdf [file 41541_2020_185_MOESM1_ESM.pdf]

## Supplementary information

**Supplementary Table 1: Virus neutralization (VN) test and hemagglutination inhibition (HI) test of chicken sera using a heterologous HPAIV H5N8 virus (A/tufted duck/Germany/AR8444-L01987/2016, clade 2.3.4.4 group B). Shown are the VN- and HI-titers and positive reactions are indicated in bold. d23 = 12 days post boost, d30 = 7 days post challenge.**

|                       | VN titer                  |       | HI titer    |       |       | VN titer |             | HI titer |      |
|-----------------------|---------------------------|-------|-------------|-------|-------|----------|-------------|----------|------|
|                       | d23                       | d30   | d23         | d30   |       | d23      | d30         | d23      | d30  |
| <b>Subadult group</b> | Vaccinated and challenged | <1:8  | <1:8        | <1:8  | <1:8  | <1:32    | <b>1:10</b> | <1:32    | <1:8 |
|                       |                           | <1:16 | <1:8        | <1:16 | <1:8  | <1:32    | <1:8        | <1:32    | <1:8 |
|                       |                           | <1:8  | <1:8        | <1:8  | <1:8  | <1:16    | <1:8        | <1:16    | <1:8 |
|                       |                           | <1:8  | <1:8        | <1:8  | <1:8  | <1:32    | <b>1:25</b> | <1:32    | <1:8 |
|                       |                           | <1:8  | <1:8        | <1:8  | <1:8  | <1:8     | <1:8        | <1:8     | <1:8 |
|                       | Juvenile group            | <1:8  | <1:8        | <1:8  | <1:8  | <1:32    | <b>1:10</b> | <1:32    | <1:8 |
|                       |                           | <1:8  | <1:8        | <1:8  | <1:8  | <1:32    | <1:8        | <1:32    | <1:8 |
|                       |                           | <1:8  | <1:8        | <1:8  | <1:8  | <1:16    | <1:8        | <1:16    | <1:8 |
|                       |                           | <1:8  | <1:8        | <1:8  | <1:8  | <1:16    | <1:8        | <1:16    | <1:8 |
|                       |                           | <1:8  | <b>1:10</b> | <1:8  | <1:8  |          |             |          |      |
| Naïve contact         | <1:16                     | <1:8  | <1:16       | <1:8  | <1:16 | <1:8     | <1:16       | <1:8     |      |
|                       | <1:8                      | <1:8  | <1:8        | <1:8  | <1:16 | <1:8     | <1:16       | <1:8     |      |
|                       | <1:16                     | <1:8  | <1:16       | <1:8  | <1:16 | <1:8     | <1:16       | <1:8     |      |
|                       | <1:16                     | <1:8  | <1:16       | <1:8  | <1:16 | <1:8     | <1:16       | <1:8     |      |
|                       | <1:16                     | <1:8  | <1:16       | <1:8  | <1:16 | <1:8     | <1:16       | <1:8     |      |

**Supplementary Table 2: Virus neutralization (VN) test and hemagglutination inhibition (HI) test of ferret sera using a heterologous HPAIV H5N8 virus (A/tufted duck/Germany/AR8444-L01987/2016, clade 2.3.4.4 group B). Shown are the VN- and HI-titers and positive reactions are indicated in bold. d22 = 12 days post boost, d28 = 6 days post challenge.**

|                           | VN titer |             | HI titer |      |
|---------------------------|----------|-------------|----------|------|
|                           | d22      | d28         | d22      | d28  |
| Vaccinated and challenged | <1:256   | <1:8        | <1:256   | <1:8 |
|                           | <1:16    | <b>1:13</b> | <1:16    | <1:8 |
|                           | <1:16    | <1:8        | <1:16    | <1:8 |
|                           | <1:64    | <1:8        | <1:64    | <1:8 |
| Naive contact             | <1:8     | <1:8        | <1:8     | <1:8 |
|                           | <1:16    | <1:8        | <1:16    | <1:8 |
|                           | <1:16    | <1:8        | <1:16    | <1:8 |
|                           | <1:64    | <1:8        | <1:64    | <1:8 |
